# Supplementary material
Source: PubMed Central journal article supplement (PMC2562434)
Supplement: halms316022-supplement_1.pdf [file halms316022-supplement_1.pdf]

**Table S1. Clinical features of Sézary syndrome patients**

| Patient | Sex /<br>Age (y) | Symptoms                            | Duration<br>(Mo) | SC<br>(%) | CD158k+<br>PBL (%) | Previous<br>treatment     | Treatment                          | Outcome     |
|---------|------------------|-------------------------------------|------------------|-----------|--------------------|---------------------------|------------------------------------|-------------|
| 1       | F/69             | Erythematous<br>plaques             | 2                | 12        | 16                 | None                      | TM, PUVA then Ch+CS,               | PR          |
|         | F/70             | Erythroderma                        | 16               | 30        | 32                 | TM, PUVA, CS,<br>Ch,      | Ch+CS then BX+IFN                  | PR          |
| 2       | M/79             | Erythroderma                        | 48               | 70        | 90                 | TM, Ch, MTX               | TM+Ch+MTX                          | PR then DOD |
| 3       | M/75             | Erythroderma                        | 60               | 70        | 80                 | TM, CS                    | Ch+TM+CS                           | PR then DOD |
| 4*      | M/61             | Erythroderma, PPK<br>Polyadenopathy | 24               | 0         | 0                  | PCT                       | Cytapheresis+IFN then<br>BX+IFN+PP | PR then DOD |
| 5       | F/72             | Erythroderma                        | 12               | 5         | ND                 | CS                        | Ch+TM+CS                           | PR then DOD |
| 6*      | M/63             | Erythroderma                        | 108              | 2         | ND                 | CS, PUVA, MTX             | Ch+CS then IFN                     | PR          |
|         | M/66             | Erythematous<br>plaques             | 138              | 2         | ND                 | Ch, CS, PUVA,<br>MTX, IFN | CS+MTX+BX                          | PR          |
| 7       | M/67             | Erythroderma, PPK                   | 12               | 12        | ND                 | None                      | TM+CS                              | CR          |
| 8       | F/75             | Erythroderma                        | 0.5              | 22        | ND                 | CS                        | Ch+TM+CS                           | PR          |
| 9       | M/77             | Erythematous plaques                | 7                | 15        | ND                 | None                      | Ch+TM+CS                           | P           |
|         | M/78             | Erythematous plaques                | 18               | 12        | ND                 | Ch, TM, CS, MTX,<br>CPM   | PUVA                               | P           |
| 10      | F/77             | Erythroderma                        | 60               | 20        | ND                 | None                      | PUVA+CS+BX                         | PR then DOD |

y, year(s); mo, month(s); SC, Sézary cells; PBL : peripheral blood lymphocytes; M, male; F, female; PPK : palmoplantar keratosis; ND, not done; TM, topical mechlorethamine; PUVA, psoralen UVA photochemotherapy; Ch, chlorambucil; CS, corticosteroid; MTX, methotrexate; IFN, interferon  $\alpha$ ; CPM, cyclophosphamide; PP, photopheresis; BX, bexarotene; PR, partial remission; DOD, dead of disease; and P, progression.

\* Data at the stage of partial remission under treatment with PCT for patient 4 and IFN $\alpha$  for patient 6.
