# Supplementary material
Source: PubMed Central journal article supplement (PMC2562434)
Supplement: halms316022-supplement_2.pdf [file halms316022-supplement_2.pdf]

**Table S2. Sequences of oligonucleotide primers used for conventional and quantitative RT-PCR studies.**

| Gene name               | GenBank Accession N <sup>o</sup> | Sequence 5'-3'                                                                  | Product Size (bp) | Position (Exons)   |
|-------------------------|----------------------------------|---------------------------------------------------------------------------------|-------------------|--------------------|
| <b>Conventional PCR</b> |                                  |                                                                                 |                   |                    |
| <i>ACTB</i> *           | NM_001101                        | Forward : GCGGGAAATCGTGCGTGCGTGACATT<br>Reverse : GATGGAGTTGAAGGTAGTTTCGTG      | 232               | 615-846            |
| <i>KIR3DL2</i>          | NM_006737                        | Forward : CGGTCCCTTGATGCCTGT<br>Reverse : GACCACACGCAGGGCAG                     | 369               | 546-914<br>(4-5)   |
|                         |                                  | Forward : GAAGACAGAAGCCACGTTCCCATC T<br>Reverse : GTTTGACCACACGCAGGGCAG         | 732               | 187-918<br>(3-5)   |
|                         |                                  | Forward : CAACTTCTCCATCGGTCCCTTGATG<br>Reverse : GTCTCCCTAGAAAACCCCTCAAGA       | 841               | 534-1374<br>(4-9)  |
|                         |                                  | Forward : CGGGGGACAGAACAGTGAATAGGC<br>Reverse : GTCTCCCTAGAAAACCCCTCAAGA        | 242               | 1133-1374<br>(8-9) |
|                         |                                  | Forward : GAAGACAGAAGCCACGTTCCCATCT<br>Reverse : GTCTCCCTAGAAAACCCCTCAAGA       | 1188              | 187-1374<br>(3-9)  |
| <i>KIR3DL1</i>          | NM_013289                        | Forward : ACATCGTGGTCACAGGTCC<br>Reverse : TCGTATGTCACCTCCTC                    | 557               | 641-1197           |
| <b>Quantitative PCR</b> |                                  |                                                                                 |                   |                    |
| <i>SF3A1</i>            | NM_005877                        | Forward : TGCAGGATAAGACGGAATGGAAACTGA<br>Reverse : GTAGTAAGCCAGTGAGTTGGAATCTTTG | 179               | 2141-2319          |
| <i>CD3D</i> †           | NM_000732                        | Forward : GGTACTGGCTACCCTTCTCTCGCA<br>Reverse : CTTGTAATGTCTGAGAGCAGTGTGCCAC    | 141               | 30-270             |
| <i>KIR3DL2</i>          | NM_006737                        | Forward : CAACTTCTCCATCGGTCCCTTGATG<br>Reverse : GTTTGACCACACGCAGGGCAG          | 385               | 534-918            |
| <i>KIR3DL1</i>          | NM_013289                        | Forward : GGACATCGTGGTCACAGGTCC<br>Reverse : GCCTGGAATGTTCTGTTGACCTTGC          | 195               | 639-833            |
| <i>PLS3</i> ‡           | NM_005032                        | Forward : CCAGTTTGGCAGTTGTGGATTTAATTGAT<br>Reverse : ACAAGGTCTTCAGGGAGAGCATAAC  | 172               | 1652-1823          |

Nucleotide positions of amplified fragments were calculated from the start codon according to the sequences previously reported.

bp, base pair.

\*The *ACTB* gene encodes for  $\beta$ -actin

†The *CD3D* gene encodes for the delta chain of CD3

‡The *PLS3* gene encodes for T-plastin
